# Supplementary material
Source: PubMed Central journal article supplement (PMC6832808)

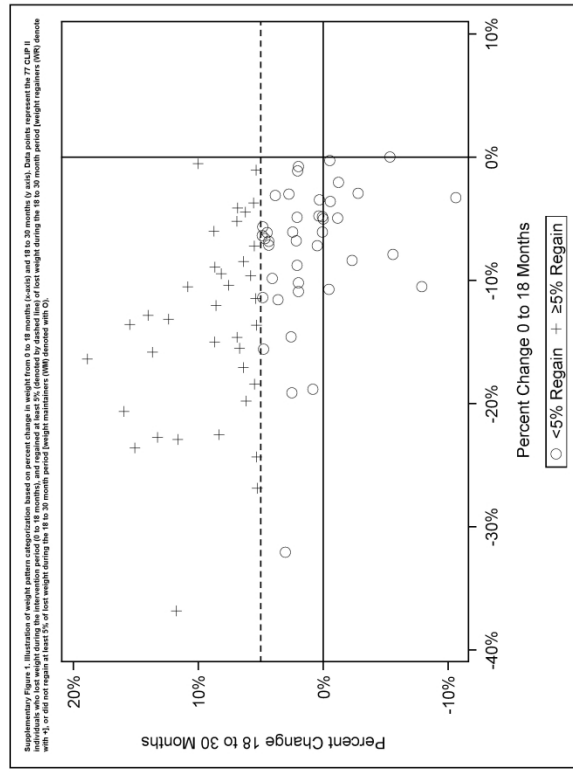

215x279mm (600 x 600 DPI)

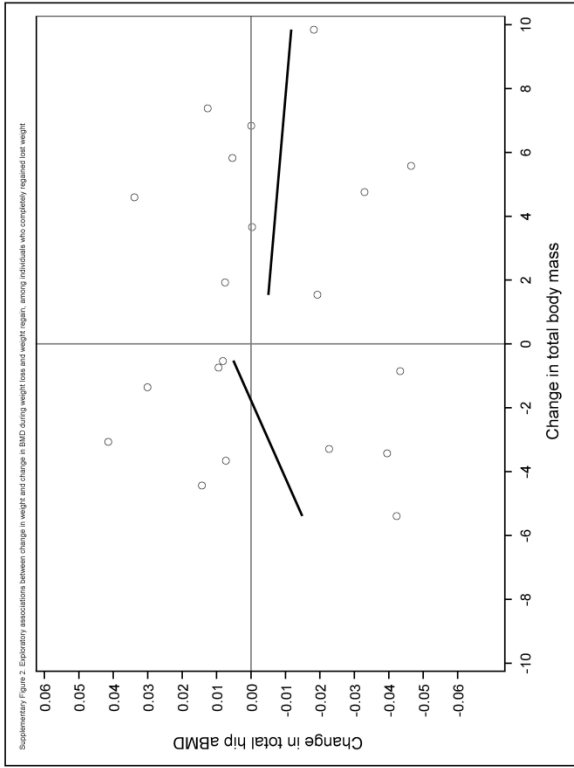

215x279mm (600 x 600 DPI)

Supplement: NIHMS1534099-supplement-1.pdf [file NIHMS1534099-supplement-1.pdf]
